# Supplementary material for: Measuring the Autistic Women’s Experience (AWE)
Source: MDPI journal article supplement (doi:10.3390/ijerph20247148), 2023-12-06
Supplement: s1 [file s1]

## Supplementary Materials S1: Full-length item list

### New items developed for AWE

All 52 newly developed items are listed below. A formatted final version of the AWE can be freely downloaded from the [Supplementary files \(www.mdpi.com/xxx/s1\)](http://www.mdpi.com/xxx/s1) and in Dutch from [emfasisonderzoek.org](http://emfasisonderzoek.org) (please cite this publication when using it).

\* = items are reverse scored; ~~Strikethrough~~ = items were removed after discriminant and factorial analysis

- ~~1. Other people often don't understand what I am trying to say\*~~
2. I go to social events when I don't want to because it's expected of me\*
- ~~3. I observe how people behave in detail\*~~
4. Contact with other people gives me energy
- ~~5. Other people sometimes say that I meddle too much\*~~
6. I know everything about one subject, for example about animals, diets, historical periods or upbringing\*
- ~~7. I burst into tears if I have too much on my mind\*~~
8. I usually adapt to the other person in a friendship\*
9. I have enough energy to do normal daily activities
- ~~10. I strongly identify with my favourite character, from a film, series, game or book for example\*~~
11. I am in touch with my body and rest when I need to
- ~~12. After a busy day I have to do nothing for a few days\*~~
- ~~13. I am fascinated by fashion, appearances, and/or make-up\*~~
- ~~14. I often forget to eat or drink\*~~
- ~~15. Other people say that I come across as social in initial contact with them, but that really doesn't happen automatically\*~~
- ~~16. I find contact with other people very tiring \*~~
17. I am good at keeping up friendships
- ~~18. I don't pay attention to how I come across in a conversation~~
19. I feel that I really fit in during a conversation
20. After a few days of doing nothing, I really have to do something
- ~~21. I find it easy to express my feelings~~
- ~~22. I'm an easy eater and like almost everything~~
- ~~23. I have periods of physical pain and/or symptoms without a clear cause\*~~
- ~~24. I can't stand it when the atmosphere in the group is not good\*~~
- ~~25. I continually check whether my clothes or hair still look okay\*~~
26. I notice when I am exhausted or overloaded in time
27. I don't have to think about how I'm going to act toward others
28. I go to social events when I don't want to because I'm afraid I won't belong otherwise\*
29. I get upset when someone else's mood isn't good\*
- ~~30. I stop eating or drinking when I'm full~~

31. After a conversation, I often think for a long time about what someone actually meant\*
32. I usually feel a connection quickly when I'm talking to others
33. I've been pretending to be social for years, but I'm actually not\*
34. I automatically know the best thing to say in a conversation
35. People and their behaviour don't interest me much\*
36. I've been doing more than I can actually handle all my life\*
37. I feel comfortable in a busy environment with a lot of noise, light, and/or smell
- ~~38. I can't stand it when others don't appreciate my honesty\*~~
39. During a conversation, I am continuously consciously observing how the other person reacts to me\*
- ~~40. I hardly ever get told that I have to adapt better to others~~
- ~~41. I find it easy to share my problems with friends~~
42. I often think out a social event completely in advance\*
- ~~43. I am fascinated by an idol, for example a pop star or a member of the royal family\*~~
44. I become quiet in a conversation with several people\*
- ~~45. I notice in time when I am thirsty or hungry~~
46. I am satisfied with my relationships with my friends, family, or partner even if they are not perfect
- ~~47. In a friendship, I want to have complete control\*~~
- ~~48. When things go wrong in a relationship, it usually has nothing to do with me~~
49. I usually consciously watch others to see what I should say\*
50. I often think out a conversation in advance\*
- ~~51. If I have too much on my mind, I get angry quickly\*~~
52. When I've done too much, I only feel it afterwards\*

## Original 50 AQ items

With permission of the Autism Research Centre, these items were taken from:

Baron-Cohen, S., Wheelwright, S., Skinner, R., Martin, J., & Clubley, E. (2001). The Autism-Spectrum Quotient (AQ): Evidence from Asperger Syndrome/High-Functioning Autism, Males and Females, Scientists and Mathematicians. *Journal of Autism and Developmental Disorders*, 31(1), 5–17.  
<https://doi.org/10.1023/A:1005653411471>

A formatted version of the original AQ can be freely downloaded from  
<https://www.autismresearchcentre.com/tests/>.

\* = items are reverse scored; ~~Strikethrough~~ = items were removed after analysis

- ~~1. I prefer to do things with others rather than on my own.~~
- ~~2. I prefer to do things the same way over and over again.\*~~
3. If I try to imagine something, I find it very easy to create a picture in my mind.
- ~~4. I frequently get so strongly absorbed in one thing that I lose sight of other things.\*~~

- ~~5. I often notice small sounds when others do not.\*~~
- ~~6. I usually notice car number plates or similar strings of information.\*~~
- ~~7. Other people frequently tell me that what I've said is impolite, even though I think it is polite.\*~~
8. When I'm reading a story, I can easily imagine what the characters might look like.
9. I am fascinated by dates.\*
- ~~10. In a social group, I can easily keep track of several different people's conversations.~~
- ~~11. I find social situations easy.~~
- ~~12. I tend to notice details that others do not.\*~~
13. I would rather go to a library than a party.\*
- ~~14. I find making up stories easy.~~
15. I find myself drawn more strongly to people than to things.
- ~~16. I tend to have very strong interests which I get upset about if I can't pursue.\*~~
- ~~17. I enjoy social chit-chat.~~
- ~~18. When I talk, it isn't always easy for others to get a word in edgeways.\*~~
19. I am fascinated by numbers.\*
20. When I'm reading a story, I find it difficult to work out the characters' intentions.\*
- ~~21. I don't particularly enjoy reading fiction.\*~~
22. I find it hard to make new friends.\*
23. I notice patterns in things all the time.\*
- ~~24. I would rather go to the theatre than a museum.~~
- ~~25. It does not upset me if my daily routine is disturbed.~~
26. I frequently find that I don't know how to keep a conversation going.\*
27. I find it easy to "read between the lines" when someone is talking to me.
- ~~28. I usually concentrate more on the whole picture, rather than the small details.~~
- ~~29. I am not very good at remembering phone numbers.~~
- ~~30. I don't usually notice small changes in a situation, or a person's appearance.~~
31. I know how to tell if someone listening to me is getting bored.
- ~~32. I find it easy to do more than one thing at once.~~
33. When I talk on the phone, I'm not sure when it's my turn to speak.\*
34. I enjoy doing things spontaneously.
35. I am often the last to understand the point of a joke.\*
36. I find it easy to work out what someone is thinking or feeling just by looking at their face.
- ~~37. If there is an interruption, I can switch back to what I was doing very quickly.~~
- ~~38. I am good at social chit-chat.~~
- ~~39. People often tell me that I keep going on and on about the same thing.\*~~
- ~~40. When I was young, I used to enjoy playing games involving pretending with other children.~~
41. I like to collect information about categories of things (e.g. types of car, types of bird, types of train, types of plant, etc.).\*

- 42. I find it difficult to imagine what it would be like to be someone else.\*
- ~~43. I like to plan any activities I participate in carefully.\*~~
- 44. I enjoy social occasions.
- 45. I find it difficult to work out people's intentions.\*
- 46. New situations make me anxious.\*
- 47. I enjoy meeting new people.
- ~~48. I am a good diplomat.~~
- ~~49. I am not very good at remembering people's date of birth.~~
- ~~50. I find it very easy to play games with children that involve pretending.~~
