# Supplementary material for: Measuring the Autistic Women’s Experience (AWE)
Source: MDPI journal article supplement (doi:10.3390/ijerph20247148), 2023-12-06
Supplement: s1 [file s1]

|     |                                                                                                                                    | Definitely agree | Slightly agree | Slightly disagree | Definitely disagree |
|-----|------------------------------------------------------------------------------------------------------------------------------------|------------------|----------------|-------------------|---------------------|
| 10. | I frequently find that I don't know how to keep a conversation going.                                                              |                  |                |                   |                     |
| 11. | I find it easy to "read between the lines" when someone is talking to me.                                                          |                  |                |                   |                     |
| 12. | I know how to tell if someone listening to me is getting bored.                                                                    |                  |                |                   |                     |
| 13. | When I talk on the phone, I'm not sure when it's my turn to speak.                                                                 |                  |                |                   |                     |
| 14. | I enjoy doing things spontaneously.                                                                                                |                  |                |                   |                     |
| 15. | I am often the last to understand the point of a joke.                                                                             |                  |                |                   |                     |
| 16. | I find it easy to work out what someone is thinking or feeling just by looking at their face.                                      |                  |                |                   |                     |
| 17. | I like to collect information about categories of things (e.g. types of car, types of bird, types of train, types of plant, etc.). |                  |                |                   |                     |
| 18. | I find it difficult to imagine what it would be like to be someone else.<br>AQ42                                                   |                  |                |                   |                     |
| 19. | I enjoy social occasions.                                                                                                          |                  |                |                   |                     |
| 20. | I find it difficult to work out people's intentions.                                                                               |                  |                |                   |                     |
| 21. | New situations make me anxious.                                                                                                    |                  |                |                   |                     |
| 22. | I enjoy meeting new people.                                                                                                        |                  |                |                   |                     |
| 23. | I go to social events when I don't want to because it's expected of me.                                                            |                  |                |                   |                     |

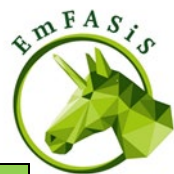

|     |                                                                                                          | Definitely agree | Slightly agree | Slightly disagree | Definitely disagree |
|-----|----------------------------------------------------------------------------------------------------------|------------------|----------------|-------------------|---------------------|
| 24. | Contact with other people gives me energy.                                                               |                  |                |                   |                     |
| 25. | I know everything about one subject, for example about animals, diets, historical periods or upbringing. |                  |                |                   |                     |
| 26. | I usually adapt to the other person in a friendship.                                                     |                  |                |                   |                     |
| 27. | I have enough energy to do normal daily activities.                                                      |                  |                |                   |                     |
| 28. | I am in touch with my body and rest when I need to.                                                      |                  |                |                   |                     |
| 29. | I am good at keeping up friendships.                                                                     |                  |                |                   |                     |
| 30. | I feel that I really fit in during a conversation.                                                       |                  |                |                   |                     |
| 31. | After a few days of doing nothing, I really have to do something                                         |                  |                |                   |                     |
| 32. | I notice when I am exhausted or overloaded in time.                                                      |                  |                |                   |                     |
| 33. | I don't have to think about how I'm going to act toward others.                                          |                  |                |                   |                     |
| 34. | I go to social events when I don't want to because I'm afraid I won't belong otherwise.                  |                  |                |                   |                     |
| 35. | I get upset when someone else's mood isn't good.                                                         |                  |                |                   |                     |
| 36. | After a conversation, I often think for a long time about what someone actually meant.                   |                  |                |                   |                     |
| 37. | I usually feel a connection quickly when I'm talking to others.                                          |                  |                |                   |                     |

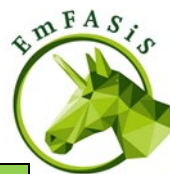

|     |                                                                                                        | Definitely agree | Slightly agree | Slightly disagree | Definitely disagree |
|-----|--------------------------------------------------------------------------------------------------------|------------------|----------------|-------------------|---------------------|
| 38. | I've been pretending to be social for years, but I'm actually not.                                     |                  |                |                   |                     |
| 39. | I automatically know the best thing to say in a conversation.                                          |                  |                |                   |                     |
| 40. | People and their behaviour don't interest me much.                                                     |                  |                |                   |                     |
| 41. | I've been doing more than I can actually handle all my life.                                           |                  |                |                   |                     |
| 42. | I feel comfortable in a busy environment with a lot of noise, light, and/or smell.                     |                  |                |                   |                     |
| 43. | During a conversation, I am continuously consciously observing how the other person reacts to me.      |                  |                |                   |                     |
| 44. | I often think out a social event completely in advance.                                                |                  |                |                   |                     |
| 45. | I become quiet in a conversation with several people.                                                  |                  |                |                   |                     |
| 46. | I am satisfied with my relationships with my friends, family, or partner even if they are not perfect. |                  |                |                   |                     |
| 47. | I usually consciously watch others to see what I should say                                            |                  |                |                   |                     |
| 48. | I often think out a conversation in advance.                                                           |                  |                |                   |                     |
| 49. | When I've done too much, I only feel it afterwards.                                                    |                  |                |                   |                     |
