# Supplementary material for: Measuring the Autistic Women’s Experience (AWE)
Source: MDPI journal article supplement (doi:10.3390/ijerph20247148), 2023-12-06
Supplement: s1 [file s1]

|     |                                                                                                                                            | Definitely agree | Slightly agree | Slightly disagree | Definitely disagree |
|-----|--------------------------------------------------------------------------------------------------------------------------------------------|------------------|----------------|-------------------|---------------------|
| 9.  | I notice patterns in things all the time.<br>AQ23 AD                                                                                       | 4                | 3              | 2                 | 1                   |
| 10. | I frequently find that I don't know how to keep a conversation going. AQ26 SFC                                                             | 4                | 3              | 2                 | 1                   |
| 11. | I find it easy to "read between the lines" when someone is talking to me. AQ27 SI                                                          | 1                | 2              | 3                 | 4                   |
| 12. | I know how to tell if someone listening to me is getting bored. AQ31 SI                                                                    | 1                | 2              | 3                 | 4                   |
| 13. | When I talk on the phone, I'm not sure when it's my turn to speak. AQ33 SFC                                                                | 4                | 3              | 2                 | 1                   |
| 14. | I enjoy doing things spontaneously. AQ34 ISM                                                                                               | 1                | 2              | 3                 | 4                   |
| 15. | I am often the last to understand the point of a joke. AQ35 SI                                                                             | 4                | 3              | 2                 | 1                   |
| 16. | I find it easy to work out what someone is thinking or feeling just by looking at their face. AQ36 SI                                      | 1                | 2              | 3                 | 4                   |
| 17. | I like to collect information about categories of things (e.g. types of car, types of bird, types of train, types of plant, etc.). AQ41 AD | 4                | 3              | 2                 | 1                   |
| 18. | I find it difficult to imagine what it would be like to be someone else. AQ42 SI                                                           | 4                | 3              | 2                 | 1                   |
| 19. | I enjoy social occasions. AQ44 ISM                                                                                                         | 1                | 2              | 3                 | 4                   |
| 20. | I find it difficult to work out people's intentions. AQ45 SI                                                                               | 4                | 3              | 2                 | 1                   |
| 21. | New situations make me anxious. AQ46 SFC                                                                                                   | 4                | 3              | 2                 | 1                   |

|     |                                                                                                                    | Definitely agree | Slightly agree | Slightly disagree | Definitely disagree |
|-----|--------------------------------------------------------------------------------------------------------------------|------------------|----------------|-------------------|---------------------|
| 22. | I enjoy meeting new people. AQ47 ISM                                                                               | 1                | 2              | 3                 | 4                   |
| 23. | I go to social events when I don't want to because it's expected of me. Novel2 SFC                                 | 4                | 3              | 2                 | 1                   |
| 24. | Contact with other people gives me energy. Novel4 ISM                                                              | 1                | 2              | 3                 | 4                   |
| 25. | I know everything about one subject, for example about animals, diets, historical periods or upbringing. Novel6 AD | 4                | 3              | 2                 | 1                   |
| 26. | I usually adapt to the other person in a friendship. Novel8 SFC                                                    | 4                | 3              | 2                 | 1                   |
| 27. | I have enough energy to do normal daily activities. Novel9 SB                                                      | 1                | 2              | 3                 | 4                   |
| 28. | I am in touch with my body and rest when I need to. Novel11 SB                                                     | 1                | 2              | 3                 | 4                   |
| 29. | I am good at keeping up friendships. Novel 17 SFC                                                                  | 1                | 2              | 3                 | 4                   |
| 30. | I feel that I really fit in during a conversation. Novel19 SFC                                                     | 1                | 2              | 3                 | 4                   |
| 31. | After a few days of doing nothing, I really have to do something. Novel 20 ISM                                     | 1                | 2              | 3                 | 4                   |
| 32. | I notice when I am exhausted or overloaded in time. Novel 26 SB                                                    | 1                | 2              | 3                 | 4                   |
| 33. | I don't have to think about how I'm going to act toward others. Novel27 SFC                                        | 1                | 2              | 3                 | 4                   |
| 34. | I go to social events when I don't want to because I'm afraid I won't belong otherwise. Novel28 SFC                | 4                | 3              | 2                 | 1                   |

|     |                                                                                                                    | Definitely agree | Slightly agree | Slightly disagree | Definitely disagree |
|-----|--------------------------------------------------------------------------------------------------------------------|------------------|----------------|-------------------|---------------------|
| 35. | I get upset when someone else's mood isn't good. Novel29 SFC                                                       | 4                | 3              | 2                 | 1                   |
| 36. | After a conversation, I often think for a long time about what someone actually meant. Novel31 SFC                 | 4                | 3              | 2                 | 1                   |
| 37. | I usually feel a connection quickly when I'm talking to others. Novel32 ISM                                        | 1                | 2              | 3                 | 4                   |
| 38. | I've been pretending to be social for years, but I'm actually not. Novel33 ISM                                     | 4                | 3              | 2                 | 1                   |
| 39. | I automatically know the best thing to say in a conversation. Novel34 SFC                                          | 1                | 2              | 3                 | 4                   |
| 40. | People and their behaviour don't interest me much. Novel35 ISM                                                     | 4                | 3              | 2                 | 1                   |
| 41. | I've been doing more than I can actually handle all my life. Novel36 SB                                            | 4                | 3              | 2                 | 1                   |
| 42. | I feel comfortable in a busy environment with a lot of noise, light, and/or smell. Novel37 ISM                     | 1                | 2              | 3                 | 4                   |
| 43. | During a conversation, I am continuously consciously observing how the other person reacts to me. Novel39 SFC      | 4                | 3              | 2                 | 1                   |
| 44. | I often think out a social event completely in advance. Novel42 SFC                                                | 4                | 3              | 2                 | 1                   |
| 45. | I become quiet in a conversation with several people. Novel44 SFC                                                  | 4                | 3              | 2                 | 1                   |
| 46. | I am satisfied with my relationships with my friends, family, or partner even if they are not perfect. Novel46 SFC | 1                | 2              | 3                 | 4                   |

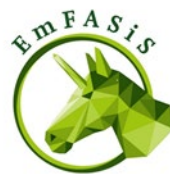

|     |                                                                           | Definitely agree | Slightly agree | Slightly disagree | Definitely disagree |
|-----|---------------------------------------------------------------------------|------------------|----------------|-------------------|---------------------|
| 47. | I usually consciously watch others to see what I should say. Novel 49 SFC | 4                | 3              | 2                 | 1                   |
| 48. | I often think out a conversation in advance. Novel50 SFC                  | 4                | 3              | 2                 | 1                   |
| 49. | When I've done too much, I only feel it afterwards. Novel52 SB            | 4                | 3              | 2                 | 1                   |

## Score calculation of the AWE

The item numbers refer to the final item list of the AWE.

Straight items (“definitely agree” scores 1 point, “slightly agree” scores 2 points, “slightly disagree” scores 3 points, and “definitely disagree” scores 4 points): 1, 2, 5, 11, 12, 14, 16, 19, 22, 24, 27, 28, 29, 30, 31, 32, 33, 37, 39, 42, 46

Reversed items (“definitely agree” scores 4 points, “slightly agree” scores 3 points, “slightly disagree” scores 2 points, and “definitely disagree” scores 1 point): 3, 4, 6, 7, 8, 9, 10, 13, 15, 17, 18, 20, 21, 23, 25, 26, 34, 35, 36, 38, 40, 41, 43, 44, 45, 47, 48, 49

The total AWE score is calculated by summing the score of all the above-mentioned items. The minimum score is 49 and the maximum score is 196, with a score of 123+ predicting an autism diagnosis.

The subscale scores are calculated by summing the scores on all items of a respective scale. The subscales are:

Social functioning and communication (SFC): 8, 10, 13, 21, 23, 26, 29, 30, 33, 34, 35, 36, 39, 43, 44, 45, 46, 47, 48

Initiative and social motivation (ISM): 4, 5, 14, 19, 22, 24, 31, 37, 38, 40, 42

Social intuition (SI): 1, 2, 7, 11, 12, 15, 16, 18, 20

Sensing boundaries (SB): 27, 28, 32, 41, 49

Attention to detail (AD): 3, 6, 9, 17, 25

## Dutch norms (EmFASiS 2023)

Women from the general population (N = 237, age 16-82 years)

|            | VERY LOW | LOW         | AVERAGE    | HIGH         | VERY HIGH |
|------------|----------|-------------|------------|--------------|-----------|
|            | Perc≤2.5 | 2.5<Perc≤35 | 35<Perc≤65 | 65<Perc≤97.5 | Perc>97.5 |
| <b>AWE</b> | ≤67      | 68 - 89     | 90 - 105   | 106 - 134    | >134      |
| <b>SFC</b> | ≤24      | 25 - 37     | 38 - 44    | 45 - 62      | >62       |
| <b>ISM</b> | ≤13      | 14 - 18     | 19 - 22    | 23 - 29      | >29       |
| <b>SI</b>  | ≤10      | 11 - 14     | 15 - 18    | 19 - 23      | >23       |
| <b>SB</b>  | ≤6       | 7 - 10      | 11 - 12    | 13 - 19      | >19       |
| <b>AD</b>  | ≤5       | 6 - 8       | 9 - 10     | 11 - 17      | >17       |

### Men from the general population (N = 236, age 18-86 years)

|            | VERY LOW | LOW         | AVERAGE    | HIGH         | VERY HIGH |
|------------|----------|-------------|------------|--------------|-----------|
|            | Perc≤2.5 | 2.5<Perc≤35 | 35<Perc≤65 | 65<Perc≤97.5 | Perc>97.5 |
| <b>AWE</b> | ≤67      | 68 - 92     | 93 - 105   | 106 - 132    | >132      |
| <b>SFC</b> | ≤25      | 26 - 37     | 38 - 42    | 43 - 58      | >58       |
| <b>ISM</b> | ≤12      | 13 - 19     | 20 - 23    | 24 - 36      | >36       |
| <b>SI</b>  | ≤9       | 10 - 16     | 17 - 19    | 20 - 25      | >25       |
| <b>SB</b>  | ≤5       | 6 - 9       | 10 - 11    | 12 - 16      | >16       |
| <b>AD</b>  | ≤5       | 6 - 10      | 11 - 13    | 14 - 17      | >17       |

### Autistic women (N = 79, age 19-64 years)

|            | VERY LOW | LOW         | AVERAGE    | HIGH         | VERY HIGH |
|------------|----------|-------------|------------|--------------|-----------|
|            | Perc≤2.5 | 2.5<Perc≤35 | 35<Perc≤65 | 65<Perc≤97.5 | Perc>97.5 |
| <b>AWE</b> | ≤95      | 96 - 136    | 137 - 147  | 148 - 171    | >171      |
| <b>SFC</b> | ≤35      | 36 - 57     | 58 - 62    | 63 - 73      | >73       |
| <b>ISM</b> | ≤19      | 20 - 29     | 30 - 33    | 34 - 41      | >41       |
| <b>SI</b>  | ≤13      | 14 - 21     | 22 - 25    | 26 - 33      | >33       |
| <b>SB</b>  | ≤11      | 12 - 15     | 16 - 18    | 19 - 20      | >20       |
| <b>AD</b>  | ≤7       | 8 - 12      | 13 - 14    | 15 - 19      | >19       |

### Autistic men (N = 59, age 16-72 years)

|            | VERY LOW | LOW         | AVERAGE    | HIGH         | VERY HIGH |
|------------|----------|-------------|------------|--------------|-----------|
|            | Perc≤2.5 | 2.5<Perc≤35 | 35<Perc≤65 | 65<Perc≤97.5 | Perc>97.5 |
| <b>AWE</b> | ≤90      | 91 - 125    | 126 - 143  | 144 - 171    | >171      |
| <b>SFC</b> | ≤33      | 34 - 49     | 50 - 59    | 60 - 70      | >70       |
| <b>ISM</b> | ≤16      | 17 - 28     | 29 - 32    | 33 - 41      | >41       |
| <b>SI</b>  | ≤13      | 14 - 21     | 22 - 25    | 26 - 31      | >31       |
| <b>SB</b>  | ≤7       | 8 - 14      | 15 - 17    | 18 - 20      | >20       |
| <b>AD</b>  | ≤7       | 8 - 13      | 14 - 16    | 17 - 20      | >20       |
